# Supplementary figures and images for: Joint annotation of chromatin state and chromatin conformation reveals relationships among domain types and identifies domains of cell-type-specific expression
Source: HighWire-hosted journal article supplement (doi:10.1101/gr.184341.114), 2015-02-12

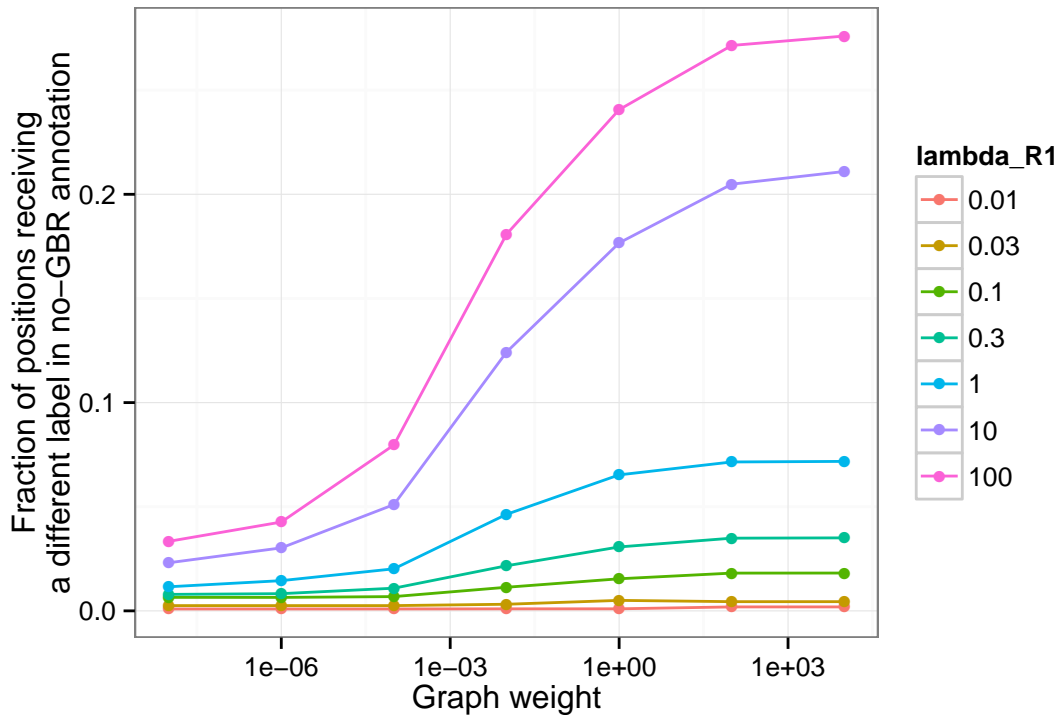

Supplement: difference_from_adding_gbr.pdf [file difference_from_adding_gbr.pdf]
